# Understanding artificial mouse-microbiome heterogeneity and six actionable themes to increase study power

Abigail R Basson<sup>1,2,3</sup>, Alexandria LaSalla<sup>1</sup>, Gretchen Lam<sup>1</sup>, Danielle Kulpins<sup>1</sup>, Erika L Moen<sup>5</sup>, Mark Sundrud<sup>6</sup>, Jun Miyoshi<sup>7</sup>, Sanja Ilic<sup>8</sup>, Betty R Theriault<sup>9</sup>, Fabio Cominelli<sup>1,2,3</sup>, Alexander Rodriguez-Palacios<sup>\*1,2,4</sup>

<sup>1</sup> Division of Gastroenterology & Liver Diseases, Case Western Reserve University School of Medicine, Cleveland, OH, USA.

<sup>2</sup> Germ-free and Gut Microbiome Core, Digestive Health Research Institute, Case Western Reserve University, Cleveland, OH, USA.

<sup>3</sup> Digestive Health Institute, University Hospitals Cleveland Medical Center, Cleveland, OH, USA.

<sup>4</sup> Mouse Models Core, Silvio O'Conte Cleveland Digestive Diseases Research Core Center, Cleveland, OH, USA.

<sup>5</sup> Department of Biomedical Data Science, Geisel School of Medicine, The Dartmouth Institute for Health Policy and Clinical Practice, Lebanon, NH, USA

<sup>6</sup> Department of Immunology and Microbiology, The Scripps Research Institute, Jupiter, FL, USA

<sup>7</sup> Department of Gastroenterology and Hepatology, Kyorin University School of Medicine, Tokyo, Japan.

<sup>8</sup> Department of Human Sciences and Nutrition, The Ohio State University, Columbus, OH, USA.

<sup>9</sup> Department of Surgery, University of Chicago, Chicago, IL, USA.

**Short Title:** Understanding Mouse Microbiome Heterogeneity and Study Power

**Disclosures:** Authors declare that there are no conflicts of interest to disclose. We confirm that this work is original and has not been published elsewhere, nor is it currently under consideration for publication elsewhere.

**Keywords:** microbiome; rigor and reproducibility; cage effects

**Abbreviations:** AALAS, American Association of Laboratory Animal Science; DDRCC, Digestive Diseases Research Core Center; GF, germ-free; ICC, intra-class correlation coefficient; IsPreFeH, Inter-subject Pre-experimental Fecal Microbiota homogenization; MxCg, mice per cage; MxGr, mice per group; TCgxGr, total cages per group.

**Preprint notes:** This manuscript has been peer-reviewed once by a Society specialist journal in gastroenterology. Motivated by policies on preprint sharing, and encouragement to integrate input from the scientific community into formal peer-review\*\*\*, we are sharing the improved manuscript version as a preprint. The goal is to obtain feedback from readers on the six recommendations we propose herein to improve study power/reproducibility, using an 'implementability-score-statistics matrix', which remains available via survey link (as described in Results section, <https://forms.gle/LxPCydybSddcndZ7A>). Any additional survey statistics gathered from the scientific community will be used to strengthen the accuracy and external validity of this report, and will be integrated into the formal peer-review process. \*\*\*Springer Nature journals unify their policy to encourage preprint sharing. Nature 569, 307 (2019), doi: 10.1038/d41586-019-01493-z

**\*Corresponding Author:** Alex Rodriguez-Palacios (axr503@case.edu)

## ABSTRACT

The negative effects of data clustering due to (intra-class/spatial) correlations are well-known in statistics to interfere with interpretation and study power. Therefore, it is unclear why housing many laboratory mice ( $\geq 4$ ), instead of one-or-two per cage, with the improper use/reporting of clustered-data statistics, abound in the literature. Among other sources of 'artificial' confounding, including cyclical oscillations of the 'cage microbiome', we quantified the heterogeneity of modern husbandry practices/perceptions. The objective was to identify actionable themes to re-launch emerging protocols and intuitive statistical strategies to increase study power. Amenable for interventions, 'cost-vs-science' discordance was a major aspect explaining heterogeneity and the reluctance to change. Combined, four sources of information (scoping-reviews, professional-surveys, expert-opinion, and 'implementability-score-statistics') indicate that a six-actionable-theme framework could minimize 'artificial' heterogeneity. With a 'Housing Density Cost Simulator' in Excel and fully annotated statistical examples, this framework could reignite the use of 'study power' to monitor the success/reproducibility of mouse-microbiome studies.

## INTRODUCTION

Laboratory mice are critical to understanding human biology in a variety of fields, from inflammatory bowel diseases, neurology, and cancer, to microbiome and nutrition. In the current era of microbiome research, multiple factors are becoming evident as sources for confounding. Integrating microbiome science into animal research necessitates that experiments control for confounding derived from emerging artificial factors, especially the 'cage microbiome',<sup>1-5</sup> which we recently discovered causes 'cyclical microbiome bias' due to the periodic accumulation of excrements in mouse cages.<sup>1</sup>

Understanding the factors that contribute to research heterogeneity will address this need. Primary factors causing artificial analytical heterogeneity and low study power include putting many mice into one cage, having insufficient cages per group, and using statistical methods that assume multiple mice in a cage are independent instead of clustered observations.

60 In statistics and science, heterogeneity is a concept that describes the uniformity and variability of an  
61 organism, a surface, or the distribution of data. Sources of study heterogeneity can be natural or artificial. Artificial  
62 heterogeneity refers to study variance introduced by humans or anthropological factors, including animal husbandry  
63 and the 'cage microbiome', which non-uniformly affect mouse biology. Fundamental to hypothesis testing, data  
64 heterogeneity determines which statistical methods are needed to decisively quantify if two independent naturally-  
65 heterogeneous groups, truly differ. To appropriately select statistics controlling for cage-clustered data, scientists  
66 must be aware of study details, namely, which data points belong to which mice and respective cages in a dataset or  
67 published figure. Unfortunately, these details are often omitted during analysis and in publications, and  
68 misconceptions on heterogeneity, husbandry and analysis may exist among leading research organizations.

69 To exemplify that scientists are under pressure and need recommendations to prevent bias and improve  
70 animal research quality and reproducibility, in the USA, the National Institutes of Health (NIH), a major federal funding  
71 institution, implemented a mandate in 2014 on 'Rigor and Reproducibility'<sup>6-8</sup> which assures research funding is  
72 constrained unless researchers prove that they consistently yield reproducible results. Our report seeks to illustrate  
73 concepts on study power and intra-class correlation among mice in a cage to support a framework based on six  
74 actionable themes to increase study reproducibility.

75 Concerning study power, two concepts of expected validity exist: internal and external validity. Both refer to  
76 the statistical expectation that results from a given study are true, reproducible, and not by random chance if a study  
77 is repeated locally (internal), or in another setting (external validity).<sup>9-11</sup> Intrinsically, experiments have high internal  
78 validity if appropriate statistics and power are applied, and if data clusters and confounders are avoided. Studies with  
79 experiments in different settings (microbiota, mouse lines) are more likely replicable; but experimental reproducibility  
80 requires appropriate power. Validity thus depends on the study power, which is the probability of not making a type II  
81 error (fail to reject false null hypotheses in favor of true alternatives). Power is a statistical measure from 0 to 1, with 1  
82 indicating highly-powered studies. While power 0.5 yields statistically haphazard results ('tossing a coin'), powers  
83 >0.8 indicate optimal chance for replication. Power increases with large sample sizes (more mice), but decreases  
84 with clustering of animals in cages by introducing a 'cage effect', and intra-class correlation coefficient (ICC)  
85 complexity to the analysis of cage-clustered data. The negative impact of cage clustering is maximum when all mice  
86 of a study group are housed in one cage because it is impossible to differentiate 'real' from 'confounding cage  
87 effects'. The negative impact of clustering is reduced when more cages, with *fewer mice per cage*, are used per  
88 group (*'less mice-per-cage is more'*).

89 Despite the 5-year-old NIH mandate, the public and federal perception on mouse research reproducibility is  
90 often negative.<sup>7,12</sup> However, to our knowledge, there are no scientific studies *i)* confirming that research  
91 reproducibility is an ongoing issue, *ii)* defining what role perceptions and academic husbandry practices play on  
92 reproducibility, or *iii)* predicting the implementability of potential solutions to increase study power, if proposed. To  
93 refine our understanding on research heterogeneity, study power and reproducibility, our study objectives were to *i)*  
94 verify research methods heterogeneity in current literature, *ii)* quantify current perceptions on mouse husbandry and  
95 microbiome using a survey, *iii)* identify potential areas of solution using a Delphi-based strategy, and *iv)* to quantify  
96 the potential implementability of an evidence-based framework of six Recommendation themes to cost-effectively  
97 increase study power using a grading scale based on perceived clarity, benefit and recommendability.

98 As an accompanying practical set of tools, we also created *i)* a simple housing density cost calculator in  
99 Excel that can be used by scientists to determine whether less animals per cage, or more cages per experimental  
100 group suit research budgets, and *ii)* and provide graphical examples and a fully annotated statistical code to compute  
101 and report analysis of cage-clustered data, and power, for both single- and clustered-caged mice. Post-hoc study  
102 power calculations were deemed cumbersome and non-informative in the past,<sup>13</sup> but more sophisticated user-friendly  
103 software now provides emerging methods to compute such important statistics,<sup>14</sup> which we propose should be used  
104 to infer and objectively monitor power and reproducibility across mouse research at large.

## 105 106 RESULTS

### 107 108 Husbandry heterogeneity and cage-cluster effects are pervasive in current literature.

109 To identify husbandry factors capable of influencing gut microbiome and study reproducibility, especially mice per  
110 cage (MxCg) and mice per group (MxGr), we reviewed 172 recent studies selected from PubMed searching 'diet-  
111 microbiome-mice' (Figure 1). From 865 articles published over the past 10 years, 93% were published in the last five  
112 years (Supplementary Materials; <https://figshare.com/s/9d0b963e287944233cb1>). Of concern, most studies failed

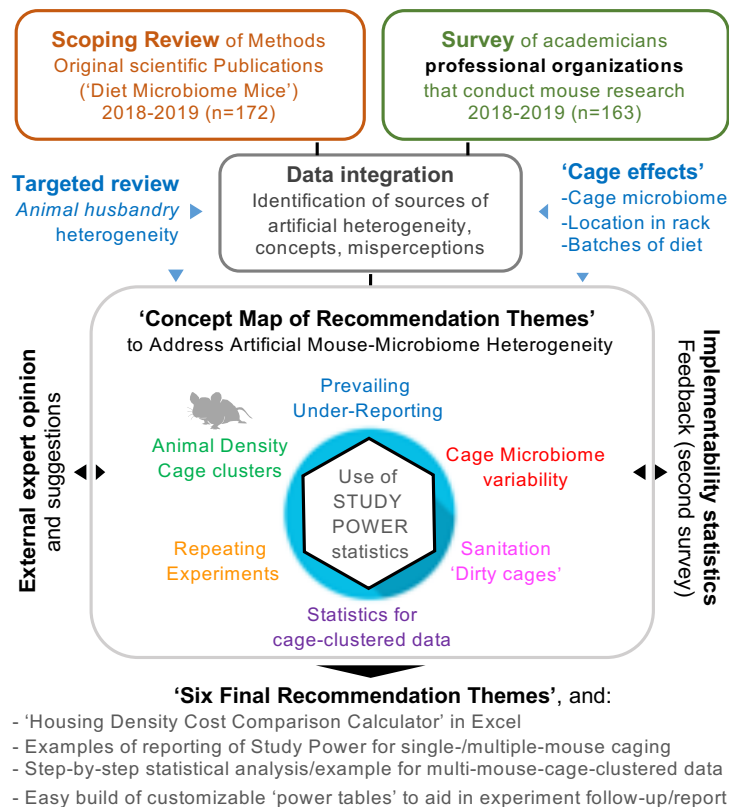

**Figure 1. Study design to understand artificial heterogeneity in mouse microbiome research.**

113 to report in sufficient detail aspects of animal husbandry (e.g., cage density/sanitation frequency, diet sterility) making  
 114 the study of cage-effects and confounding challenging to assess (Figure 2, Supplementary Figure 1). Although 57%  
 115 of the studies originated in China and USA (n=52, 30%), it is remarkable that almost 60% of studies across all  
 116 countries failed to report animal density (i.e., MxCg). Of the 72 studies that reported density, 30% (22/72) have highly  
 117 cage-clustered data; reporting experiments with 5 MxCg. Slightly encouraging, 18% of studies housed mice at lower  
 118 densities of  $\leq 2$  MxCg, which is ideal because it increases study power by decreasing cage effects (Figure 2A-C).  
 119 Although low animal density could be perceived as an expensive practice, density practices did not correlate with  
 120 gross domestic product (GDP; yearly US\$/capita) implying that national wealth is not a driving factor for housing mice  
 121 individually during experiments. Irrespective of wealth, it was reassuring to identify scientists who publish studies  
 122 stating that they exclusively housed mice individually in Belgium, Taiwan, Italy, Finland, Korea, France, Brazil and  
 123 Japan<sup>15-45</sup> (Figure 2 D-E).

124 Several husbandry aspects contribute to cage-cage variations and cause cage effects (see Supplementary  
 125 Table 1-2). Therefore, it is difficult to substantiate whether the significant effects identified in any given study, where  
 126 all mice in a group were housed in one single cage (decreasing study power), were truthfully due to the experimental  
 127 intervention and not from the random distribution of cage effects in a laboratory (Figure 2F). To quantify the potential  
 128 for 'cage effect confounding', we used the 'total number of cages per group' (TCgxGr) as a quantitative estimate (see  
 129 Methods) to determine the prevalence of studies that conducted experiments using only a few cages per group.  
 130 Estimates indicate that studies used on average  $4.4 \pm 3.2$  TCgxGr (notice large SD), of which 39% (28/72) generated  
 131 data derived from only 1-2 TCgxGr (Supplementary Figure 1).

132 Given that cage clusters decrease study power,<sup>46-48</sup> experiments conducted with low animal density, ideally  
 133 one MxCg, and the reporting of TCgxGr deserves to be highlighted as an exemplary habit. Despite available  
 134 reporting guidelines,<sup>49</sup> data illustrates that inadequate reporting of methodological details in published literature  
 135 continues in 2019, diminishing the ability to replicate studies. To complement guidelines, we propose to consider  
 136 using a standard verbatim paragraph-style format to unify reporting and facilitate future meta-analyses (see below  
 137 Recommendation Theme on 'Reporting').

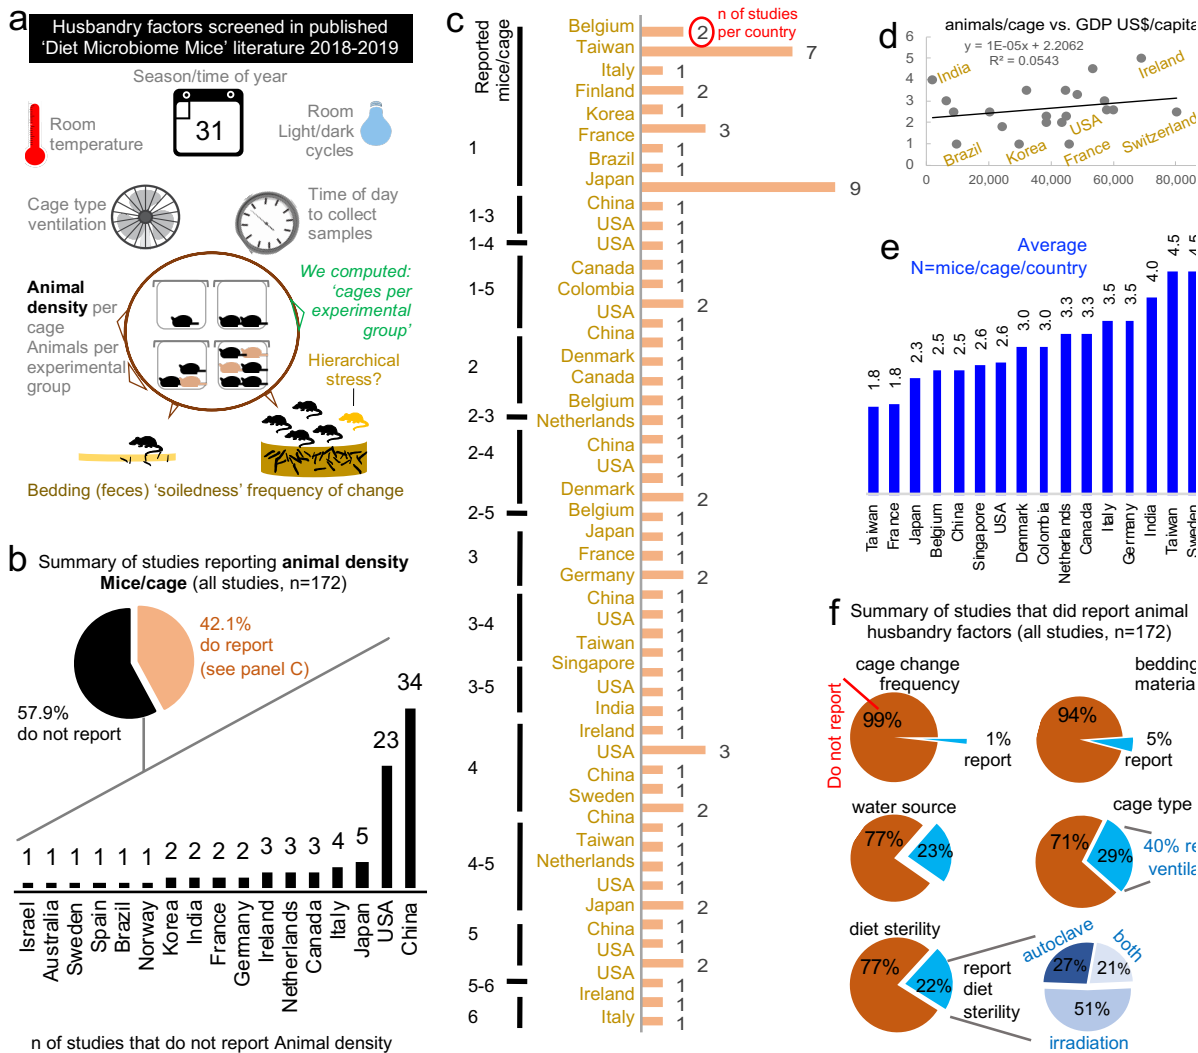

**Figure 2. Literature on 'diet, gut microbiome & mice' illustrates ongoing animal density problematics.**

Published methodologies illustrate variability in husbandry and inconsistent animal density across studies as a major source of cluster-confounding. **a**) Schematic representation of factors screened from the methods and results section in peer-reviewed publications. **b**) Distribution of studies that did and did not report animal density. Pie chart shows that most studies (58%) do not report how many animals were housed per cage. **c**) Ranking shows number of studies per country based on the number of studies reporting animal density (78 of 172 reported). **d**) Correlation between number of MxG and GDP US\$/capita. Note that the country's GDP does not correlate with number of MxG suggesting experimental animal density practices are not related to wealth of a country. **e**) Average MxG used in experiments represented by country. **f**) Summary of studies that reported cage change/sanitation frequency, bedding material and diet sterility (including method for diet sterilization; autoclaving, irradiation & dose used). Note that more studies reported 'cage type' (e.g., plastic flexible film, metal wired, Plexiglas, etc.) than those which reported 'sterility of diet' (25% vs 21%). Only one study reported 'time of fecal collection' (see complementary data in [Supplementary Figure 1](#)).

### 138 Expertise differences across scientific organizations surveyed.

139 To further advance our understanding of husbandry heterogeneity, we applied an online survey to  
 140 academicians ([Supplementary Figure 2](#)). After contacting over 2000 professionals, a total of 166 participants started  
 141 the online survey. One-hundred and sixty-three (97%) surveys were completed and used for analysis. The majority of  
 142 respondents were from USA (133; 81%, 95%CI=74.3, 87.6) and participants reflected individuals with leading roles in  
 143 science (Assistant Professors, Professors, Veterinarians) within the DDRCC, AALAS and GNOTOBIOTIC  
 144 organizations (see **Methods**). The GNOTOBIOTIC respondent set had a smaller number of faculty/veterinary  
 145 directors or managers (vs. Postdocs) compared to the DDRCC group ( $p=0.087$ , 61.4% vs. 78.8%, Odds ratio [OR] =

146 2.15 95% CI=0.82, 5.7) but included slightly more participants with access to germ-free (GF) animals compared to  
 147 DDRCC (p=0.083, 95.5% vs. 84.6%, OR = 3.82, 95%CI=0.69, 38.5, **Figure 3A-B**). Multi- and single-cage GF  
 148 isolators (used as a proxy for state-of-the-art equipment and knowledge) were most frequently used as a GF-caging  
 149 system among those with GF facility access. Collectively, demographic analysis indicates that although statistically  
 150 different, all groups had comparable levels of expertise, access to state-of-the-art facilities and knowledge (note p-  
 151 values and wide 95% CIs; see **Figure 3C-D**) which is important to inferring that the perceptions acquired herein are  
 152 relevant to current research.

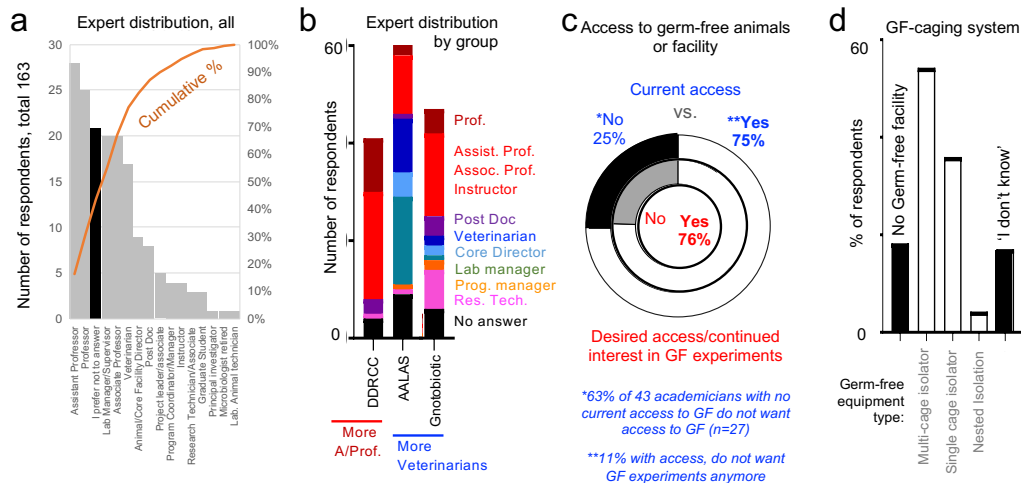

**Figure 3. Demographics of surveyed professionals on 'animal husbandry in microbiome research'.**

**a)** Pooled distribution of job descriptions categorized based on information provided by all respondents. **b)** Distribution of job descriptions by the three largest groups of participants. Notice that the DDRCC group has the largest proportion of faculty (from instructors-to-full professors) participating in the survey, but all groups were composed of academicians with comparable job descriptions. More veterinarians and project leaders were observed in the AALAS and Gnotobiotic listserv groups. **c)** Distribution of participants who reported having current access to GF animals or facilities (outer pie circle chart) and that would like to have access, or continue working with, GF animals/facilities (inner circle chart). Notice that the majority of participants are expected to have high levels of expertise and understanding of GF mouse facilities, husbandry, and microbiome knowledge. \* and \*\* indicate subgroups who would like (or not) to change their current GF research trends. **d)** Distribution of respondents who did or did not know about the presence of GF facilities in their institution, and the types of caging system used. This question contextualizes the knowledge of respondents in terms of GF equipment/systems.

### 153 Scientific organizations rank similarly 15 husbandry factors that affect the mouse microbiome.

154 To determine whether differences in knowledge/practices or perceptions on animal husbandry exist due to  
 155 the professional nature of each organization, we asked participants to rank, from 1 to 5 (least to most important), how  
 156 important each of 15 husbandry factors contribute to variability in mouse research ("Rank how important you believe  
 157 each of the following 15 aspects contribute to microbiome research variability"). Using 'diet composition' as a positive  
 158 control (as diet affects gut microbes), we found that all groups of professionals ranked each parameter similarly  
 159 (mean of ranks for all participants across factors, Kruskal-Wallis p>0.05).

160 Except for 'diet composition', ranked 1<sup>st</sup> as 'very important' by the majority of respondents (>75%), there was  
 161 marked heterogeneity in response patterns at the individual level (**Figure 4A**). Importantly, perceptions of individuals  
 162 did not cluster within their professional affiliation, suggesting that the organizations surveyed 'think' alike. Instead, we  
 163 identified 'patterns of beliefs/perception' in academia that reflect 'types of individuals', with a given set of research  
 164 practices in mind (beliefs), that differs from their peers within their organization (**Figure 4A-C**). For example, although  
 165 'coprophagia' ranked 4<sup>th</sup> overall as a 'very important' factor to microbiome variability, fewer than 40% of participants  
 166 ranked 'number of animals per cage' (ranked 8<sup>th</sup>) and 'cage change frequency' (ranked 9<sup>th</sup>) as aspects 'very  
 167 important', even though coprophagia contributes to microbiome confounding depending on the extent of 'cage  
 168 bedding soiledness' (ranked 12<sup>th</sup>), which depends on 'number of animals per cage' and 'cage change frequency'.

169 In the studies reviewed, aspects deemed 'very important' by survey respondents were not always reported,  
 170 while 'less important' factors were frequently reported. This discordant pattern of thinking-reporting was further  
 171 illustrated by individual perceptions on 'bedding type' (e.g., corncob vs. non-edible wood shavings), 'cage ventilation'  
 172 type, 'room temperature' and 'room humidity', all of which contribute to cyclical bedding microbial overgrowth (which

173 selects for aerobic microbes in cage bedding) and thus cage-cage microbiome variability.<sup>1,2,48</sup> Beliefs agreement was  
 174 identified between 'diet composition' 'diet sterility' and 'water source' (top 3 ranked factors) illustrating that dietary  
 175 intake is perceived as a collective of all aspects consumed orally, including the microbial content of diet (Figure 4D).  
 176 Most respondents do not think 'cage type' (ranked 14<sup>th</sup>) is important. The majority of reviewed studies (Figure 2F),  
 177 however, reported cage type in their methods, while the 'very important' aspect of 'diet sterility' was described in only  
 178 22% of studies reviewed. Of concern, the 'time of year/season' was the least important aspect believed to influence  
 179 the microbiome (ranked 15<sup>th</sup>); however, we have shown that cross-sectional metagenome experiments conducted in  
 180 separate seasons produce contrasting results when assessing the role of *Helicobacter* spp. in spontaneous Crohn's  
 181 disease-like ileitis in mice,<sup>3</sup> implying that repeating experiments across seasons may yield unreproducible results  
 182 over time.  
 183 As a recommendation, repeating experiments to build composite datasets, which often occurs across  
 184 seasons, should be conducted with caution unless we understand the effect of season on the microbiome and animal  
 185 physiology (see Recommendation Theme on 'Repeating Experiments').

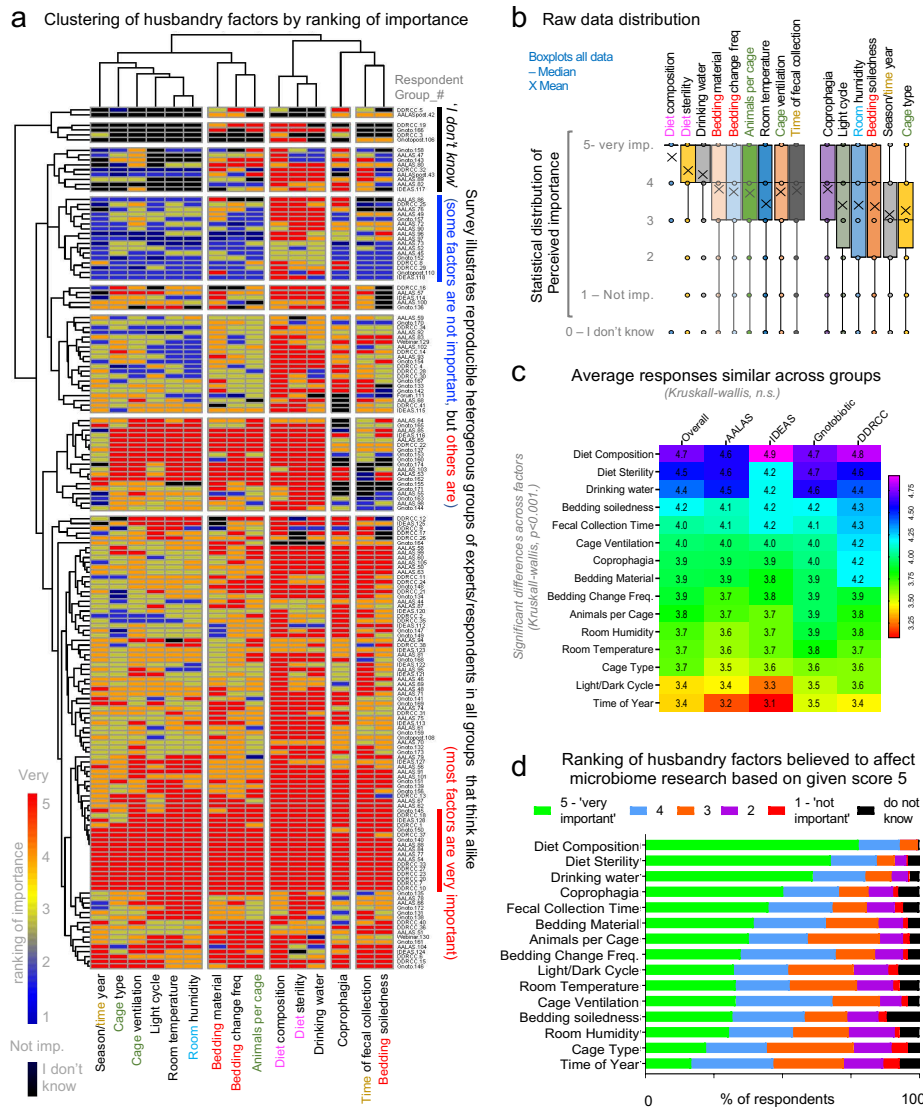

**Figure 4. Ranking of 15 factors believed to cause microbiome research variability is reproducible.**

**a)** Heat map shows respondent perceptions on the importance of various animal husbandry factors in microbiome research variability. The heterogeneity across respondent perceptions illustrates that individual thinking is not related to institutional affiliation. **b)** Boxplots show raw data ranking distribution of respondent perceptions on the importance of various animal husbandry practices. **c)** Heat map shows the overall ranking of variables according to institution. **d)** Stacked bar graphs show overall ranking of variables. Note that diet composition, sterility and drinking water were identified by >50% of individuals as 'very important' contributors to microbiome research. Note the discordance between coprophagia (ranked 4<sup>th</sup>) to that of bedding soiledness ('dirtiness') and the importance of cage change frequency.

186 **Diet-dwelling microbes and homogenizing cage microbiome variability before experiments.**

187 With sub-sterilizing radiation protocols, diets have variable microbial composition even within the same  
 188 batch.<sup>1,2,50</sup> Survey questions interrogated basic knowledge relevant to irradiation and the degree of diet sterility. When  
 189 asked whether standard irradiated commercial diets for mice were sterile, 67% answered that such diets were  
 190 'sterile'. Although diet sterility depends on the irradiation dose, in the case of commercial diets, companies employ a  
 191 single, standard dose, insufficient to achieve GF-grade sterility. Of note, no studies reviewed reported irradiation dose  
 192 when reporting *diet sterility*. Thus, unless certified as sterile, diets used during mice rearing and experiments  
 193 expectedly contain potentially confounding microbes, primarily spore-formers and gamma-radiation resistant bacteria  
 194 and fungi.<sup>51</sup> The random distribution of diet-dwelling microbes, bedding-dependent microbial overgrowth and other  
 195 cage effect factors are sources of microbiome divergence<sup>52</sup> and bias that accumulate across cages as animals are  
 196 reared and aged before, or during experimentation.

197 Since there is no consensus on one single approach to control for cage-cage microbiome variability before  
 198 using mice in experiments, we surveyed which methods are used by scientists.<sup>52-55</sup> Despite evidence that co-housed

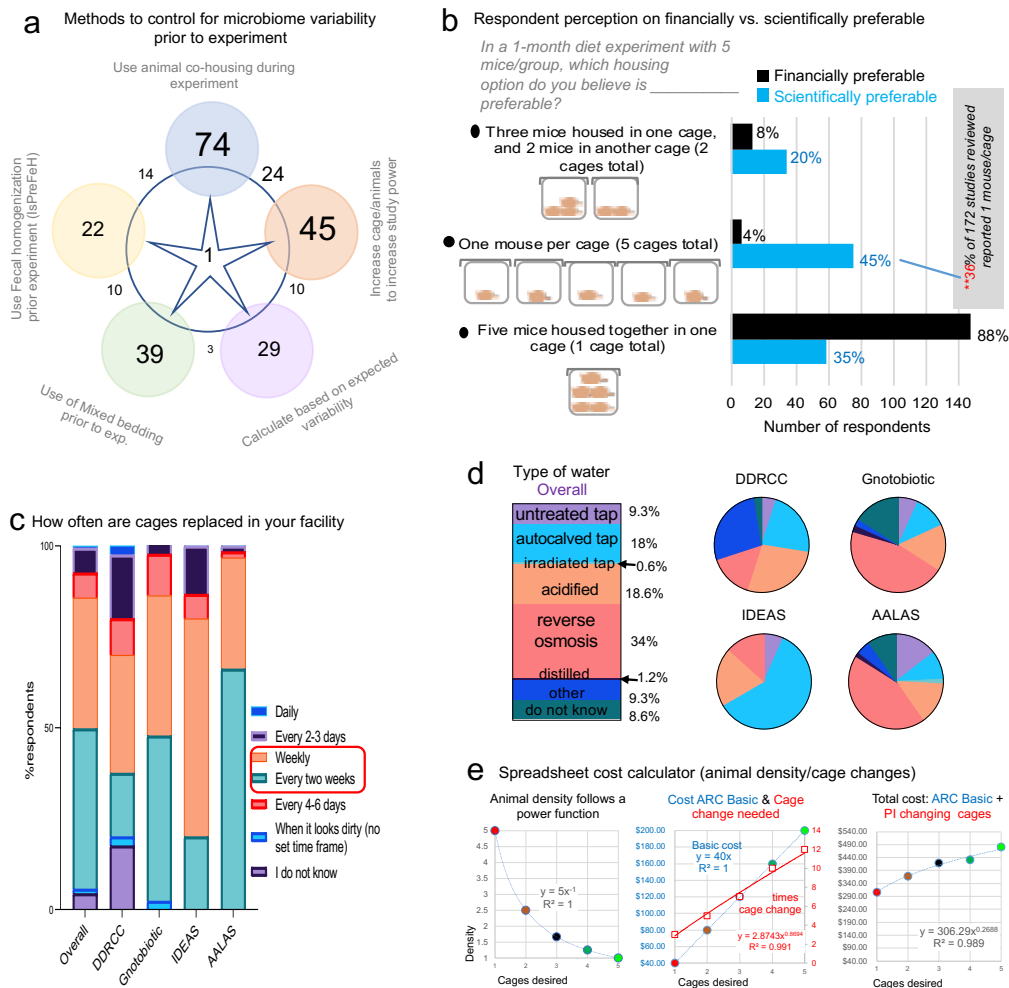

**Figure 5. Survey responses for animal husbandry practices and cost. a)** Venn diagram (*n* of respondents) on 'popularity' of various methods used to control cage-cage microbiome variability prior to the experiment. Note 'fecal homogenization protocol' compared to others. **b)** Perception contrast between the 'financial' and the 'scientific' preference when asked what animal density was preferable for a 1-month dietary experiment. Of interest, 88% and 35% of the survey respondents believe that 5 MxCg is financially and scientifically preferable than housing fewer animals per cage. **c)** Stacked bar plots show 'cage change frequency'. Most facilities change cages weekly or every 2 weeks. **d)** 'Water-type' in facilities (8.6% 'did not know'). Note wide array of water sources, including untreated tap, autoclaved tap, acidified tap and reverse osmosis, all of which affect the gut microbiota.<sup>79</sup> **e)** Cost analysis example using a customizable spreadsheet calculator (Supplementary File 1). Notice the power function correlation between 'number of cages desired' in a study and 'animal density' with the linear costs of husbandry due to payment of 'basic costs' in an Animal Resource Center (ARC) and the presumed costs of cage handling by a technician paid by the Principal Investigator (PI).

199 mice have varying microbiome patterns<sup>56,57</sup> and the recent evidence of cyclical bedding-dependent bias,<sup>1</sup> the most  
 200 popular combination of methods used to control for cage microbiome variability was ‘*cohousing*’, ‘*use of mixed*  
 201 *bedding*’ and ‘*increasing the number of animals per cage*’ (Figure 5A). The least frequently used method was ‘*fecal*  
 202 *homogenization*’ (animals exposed to a composite of feces harvested from all mice), yet this method is arguably the  
 203 simplest and most effective in homogenizing cage microbiome variability (see Recommendation Themes on ‘*Cage-*  
 204 *cage microbiome variability BEFORE experiments*’ and ‘*Dirty cages and time-of-sampling DURING*  
 205 *experiments*’).

### 207 Clusters and scientific-financial discordance when housing five mice in a study of five mice.

208 To interrogate whether cost is a contributing factor to animal housing density practices, we posed two  
 209 identical multiple-choice questions that differed only by the assumption of financial vs. scientific preference. The first  
 210 question asked, “*In a 1-month diet experiment with 5 mice/group, which housing option do you believe is*  
 211 *FINANCIALLY preferable?*” while the second question replaced the capitalized word ‘*FINANCIALLY*’ with  
 212 ‘*SCIENTIFICALLY*’. The three possible answers were, using ‘5 cages’, ‘2 cages’, or ‘1 cage’. The majority of  
 213 participants believe it is both scientifically (54%) and financially (95.7%) preferable to maintain cages with higher  
 214 animal density (2-3 or 5 MxCg), which, of concern, introduces cage cluster effects.<sup>58</sup> Thus, studies with 5 mice are

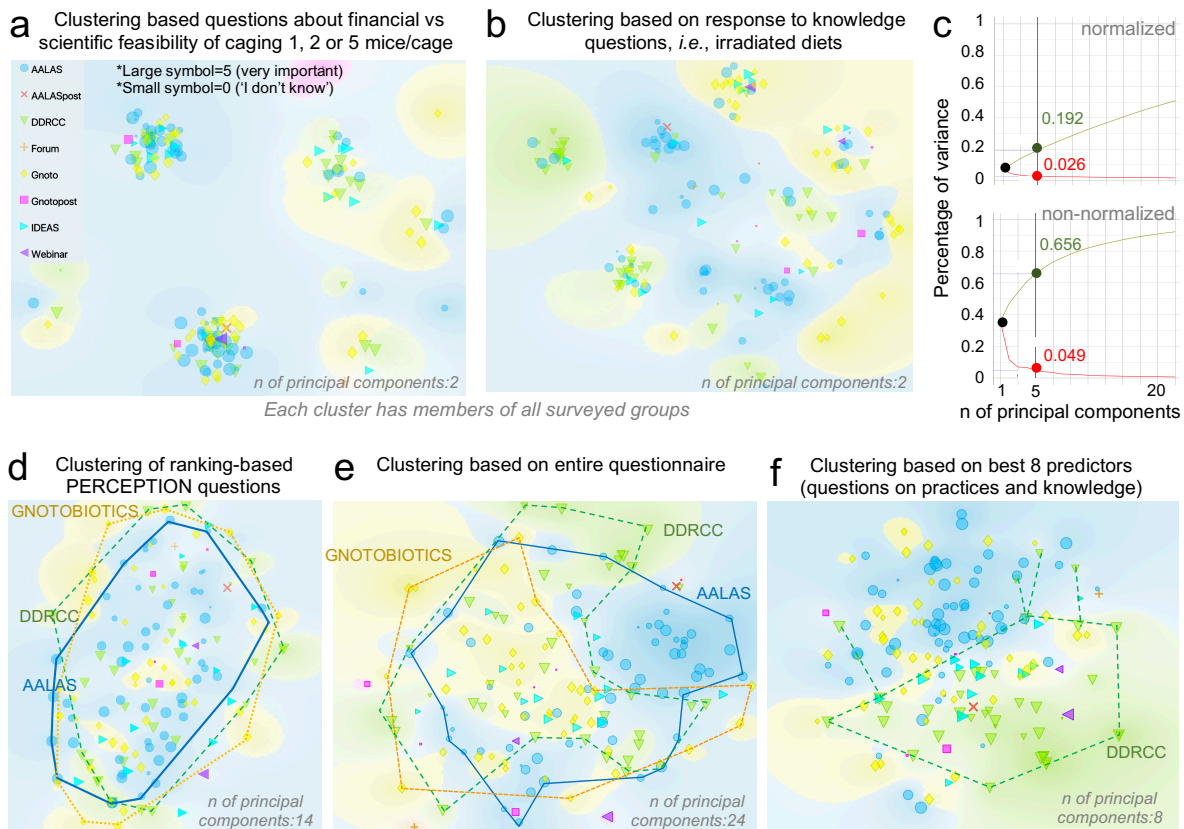

**Figure 6. Beliefs on ‘husbandry and microbiome research variability’ are similar, but professional organizations differ in response to questions on practices and knowledge.** Normalized principal component analysis of survey respondent data. Superscript asterisks: large or small symbols depict the individual response of each participant when asked how important ‘animal density’ was as a factor in influencing the gut microbiome. **a)** Clustering-based questions about financial vs. scientific feasibility of caging 1, 2 or 5 MxCg. Notice that each cluster (type of response patterns) contain individuals from all professional groups, i.e., AALAS. **b)** Clustering-based knowledge questions, i.e., irradiated diets. Notice the same pattern as in panel A, suggesting that response heterogeneity is not due to group. **c)** Normalized and non-normalized percentage of variance in entire data set explained by the maximum number of components (questions;  $n=24$ ) using “animal density” as outcome for prediction (which cannot be achieved as large and small symbols occur throughout plot). **d)** Cloud representation of collective influence of the 15 questions to predict group separation. **e)** Clustering based on 15 ranking-based PERCEPTION questions + 11 Knowledge, Financial vs. Scientific feasibility, access to facilities and practices. Although clusters of individuals collectively think very similarly and slightly different than the rest, analysis indicate that the different clustering for certain areas in the plot is due to differences in answers related to ‘type of facilities’, or practices that are more common among certain groups of professionals. **f)** Best achievable clustering of individuals based on relief F scores to predict animal density shows surveys from different groups are distinct.



215 underpowered as they consist of only 1-2 cages; commonly seen in studies reviewed. Intriguingly, while 45%  
 216 (95%CI=37.3, 52.6) of respondents think that it is more scientifically appropriate to have 1 MxCg, the same  
 217 individuals do not think that this practice is economically feasible (Figure 5B), which reflects current literature where  
 218 only 15% (95%CI=9.6, 20.3) of studies reported exclusively housing 1 MxCg (see Figure 2C).

219 Considering that the majority of respondents' facilities implement weekly or every 2 weeks 'cage change'  
 220 protocols, with a wide array of drinking water sources across facilities (Figure 5C-D), our data suggests that cage  
 221 change/sanitation (via 'cage microbiome'), and animal density could contribute greatly to artificial heterogeneity in  
 222 mouse research.

223 To address concerns of cost regarding the number of MxCg in context to 'cage change frequency', we developed an  
 224 Excel spreadsheet 'Housing Density Cost Comparison Calculator'. Graphical cost-effectiveness analysis illustrates  
 225 that a higher number of MxCg requires more frequent cage changes (Figure 5E, available as  
 226 <https://figshare.com/s/377fa429bd8cc405fc1b>). Overall, costs increase when comparing 5 vs. 1 MxCg linearly over a  
 227 continuum of cage cluster possibilities, therefore conducting highly clustered underpowered studies is not necessarily  
 228 cheaper. When considering response patterns regarding financial vs. scientific feasibility of animal housing density,  
 229 we show that the heterogeneity in respondents' perceptions is not attributed to institution but instead to professional  
 230 organization (Figure 6A-F).

231 Although scientists could argue that statistical methods exist to control for clustering,<sup>58</sup> our analysis of  
 232 literature indicates that scientists do not implement cluster-statistics. Since cluster-statistics are not trivial to  
 233 implement (e.g., R Statistical Package 'clusterPower'<sup>59</sup>), we provide technical guidelines on how to account for  
 234 unbalanced MxCg designs, ICC and low sample size using clustered-data statistics (see Recommendation Themes  
 235 5-6 on 'Animal density, clusters, ICC, and power').

### 237 Implementability of a multi-theme framework to favor study power and reproducibility.

238 To objectively determine if the 'Recommendations' described below (supporting a multi-theme actionable  
 239 framework, Figures 1 and 7A) were *i)* clearly drafted as a sentence (*sentence clarity*), *ii)* had the potential benefit to  
 240 improve power and reproducibility (*potential benefit*), and *iii)* were deemed appropriate for readers to recommend to  
 241 others (*would you recommend it?*), we asked active academicians and scientists conducting research to grade each  
 242 recommendation and provide comments to create an 'implementability grade metric' (Supplementary Table 3). To  
 243 quantify whether the obtained implementability grades were significantly different from random responses, we  
 244 compared the distribution of grades to that of a random generator of 30 numbers, from 1-10.

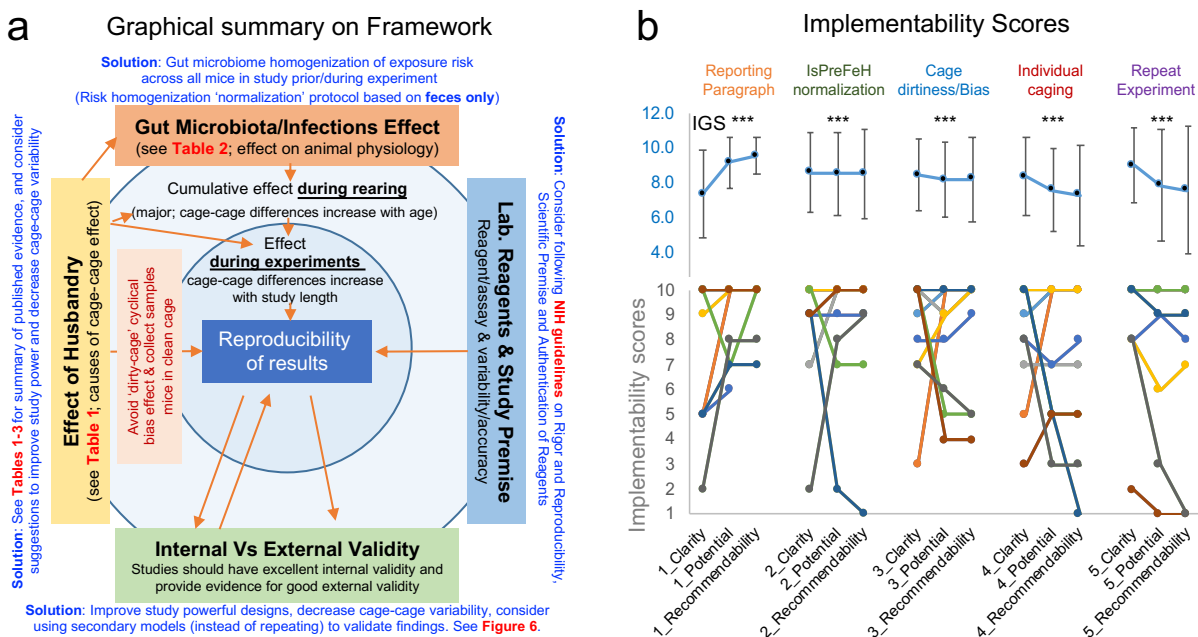

**Figure 7. Implementability of recommendation theme framework. a)** Framework integrating NIH guidelines, and our recommendations. **b)** Implementability grades scores (IGS) for each recommendation. Asterisks indicate IGS were statistically higher than random simulations (see statistics details in-text). Line plot connects individual grades. Notice that people who disagree with sentence clarity tend to disagree interpreting the potential benefits. High mean grades indicate high potential for implementability.

245 A grade of 1 indicates poor, while a grade 10 means outstanding. Of great practical value for the multi-  
246 theme framework proposed, analysis indicated that, collectively, all recommendations are very likely to be  
247 implemented by scientists (mean grade,  $8.02 \pm 1.4$  vs. random grade 5.0,  $n=20$ , t-test  $p < 0.001$ ; **Figure 7B**).

248 The wording of the final recommendations, underlined with '*quotation marks and italics*' reflect the improved  
249 version of the expert-graded sentences and comments received during the grading phase. See all comments in  
250 **Supplementary Table 4**, and a synthesis of the peer-reviewed studies supporting the framework in **Supplementary**  
251 **Table 5**. The implementability statistics, rationale (extended version in **Supplementary Table 6**), and goals for each  
252 Recommendation are described below.

### 253 **Recommendation theme 1 on 'Reporting of diet and husbandry factors'.**

254 Reproducibility will occur only if critical study details are provided in published literature. Our review of  
255 studies combined with the high number of ARRIVE guideline<sup>49</sup> citations (>3000) indicates that while 'checklists' may  
256 improve reporting quality, they do not ensure reporting with sufficient/consistent detail. A template paragraph for  
257 reporting would enforce uniform transparency, reproducibility, and enable rapid data mining for future meta-analyses,  
258 widely used to help guide the practice of medicine, but scarcely used in basic science. We **recommend** the '*Use of a*  
259 *paragraph-style template to report detailed diet and husbandry factors consistently and reproducibly (e.g.,*  
260 *macronutrient, diet sterility), publishable as accompanying 'Supplementary Materials'*' (see reporting template in  
261 **Supplementary Table 7**). The **goal** is to minimize reporting with insufficient detail or details that are open to  
262 interpretation, yet still suffice standard reporting checklists/guidelines<sup>49</sup>. The expert-prediction for **implementation** is  
263 significantly high (grade,  $8.7 \pm 1.2$  with 99.5% probability of being significantly higher than random in 96.7% [ $n=29$ ] of t-  
264 test analysis conducted for 30 simulations with 30 random numbers, mean t-test  $p=0.005 \pm 0.012$ ). Note that 'text-  
265 recycling' is currently allowed (when clearly justified) based on current code of ethics in scientific publishing.<sup>60-62</sup>

### 266 **Recommendation theme 2 on 'Cage-cage microbiome variability BEFORE mouse experiments'.**

267 Fecal bacterial profiles can differ widely between cages within a single mouse strain housed under identical  
268 conditions and occurs even across mice produced for experimentation in contained breeding colonies.<sup>2,3,63</sup> Our  
269 survey demonstrated that although scientists implement strategies to control for cage microbiome variability before  
270 experiments,<sup>2,55,56</sup> there is ample variability of arguably reproducible method combinations used across organizations.  
271 A fecal homogenization protocol wherein all mice are administered a composite of freshly collected feces via oral  
272 gavage for 3 days,<sup>54</sup> has been shown to effectively minimize inter-cage gut microbiota heterogeneity before  
273 experimentation.<sup>54,55,64</sup> We **recommend** the '*Use of a fecal matter-based microbiome normalization protocol (e.g., by*  
274 *orally administering a homogenous pool of feces from a group of mice intended for experimentation to all the mice at*  
275 *baseline prior to starting the study) to homogenize the microbial exposure risk across all mice intended for an*  
276 *experiment, and thus reduce the cage-cage microbiome variability that naturally occurs as animals age during*  
277 *intensive production of animals for research and experiments.'* The **goal** is to normalize microbiome variability that  
278 accumulates across cages over the lifespan of mice before experiments. The expert-prediction for **implementation** is  
279 significantly high (grade,  $8.5 \pm 0.04$ ; 98.25% probability of higher score vs. random; significant in 86.6% of simulations,  
280 t-test  $p=0.018 \pm 0.03$ ). Described in 2014 as 'Inter-subject Pre-experimental Fecal Microbiota homogenization'  
281 (IsPreFeH),<sup>54</sup> this revised microbiome 'normalization' protocol, which excludes use of soiled bedding material, in  
282 combination with a reproducible protocol for oral gavage of microorganisms,<sup>65</sup> is a scalable solution.

### 283 **Recommendation theme 3 on "'Dirty cages" and time of sampling DURING experiments'.**

284 Our survey showed ample heterogeneity in timing of mouse cage sanitation protocols despite recent studies  
285 indicating that bedding soiledness ('dirtiness') contributes to periodic variations in gut microbiome via  
286 contact/coprophagia.<sup>1,52</sup> Mouse experiments would benefit if conducted with cages having reduced animal density (1-  
287 2 MxG) with biological samples systematically collected from clean cages at the same time of day to avoid diurnal  
288 variation.<sup>66-68</sup> We **recommend** to '*Prevent the uncontrolled accumulation of animal excrements in the cage, i) house*  
289 *a homogeneous number of animals per cage (ideally at low density, 1 mouse/cage), ii) adjust frequency of cage*  
290 *sanitation based on animal density, and iii) collect samples 1-2 days after mice have been in clean bedding/cages,*  
291 *because coprophagia and 'dirty cages' affect the mouse physiology and microbiota.'* The **goal** is to minimize the  
292 uncontrolled permanent contact of mice with their (decomposing) feces. The expert-prediction for **implementation** is  
293 significantly high (grade,  $8.3 \pm 0.15$ ; 98.7% of probability of higher vs. random; significant in 96.6% of simulations, t-  
294 test  $p=0.014 \pm 0.024$ ). Given that coprophagia (not relevant to humans) and excrements in cages may cause bedding-  
295

298 dependent cyclical microbiome bias,<sup>1</sup> frequent cage replacements (increases with animal density,<sup>1</sup> **Supplementary**  
 299 **Figure 3**), studying/sampling mice in clean cages and/or the use of slatted floors<sup>69</sup> deserve emphasis.

300  
 301 **Recommendation theme 4 on ‘Repeating experiments in different seasons’.**

302 As reflected by the literature reviewed and the misconceptions documented in our survey, little is known  
 303 about the effect of time of year/season on mouse research heterogeneity.<sup>3,63,70</sup> Since it is almost impossible to control  
 304 for seasonal variation within long-term, or multiple short-term experiments spanning over several seasons, it is  
 305 important to take measures to improve measures taken to improve study variation/reproducibility over time (e.g., food  
 306 batch, inter-experiment IsPreFeH). We **recommend** to *‘Plan and execute statistically powerful designs and do not*  
 307 *repeat underpowered (cage clustered, low sample size) experiments in different seasons (because several*  
 308 *unforeseen factors affecting animal husbandry are challenging to detect and control for in diet and personnel).*’ The  
 309 **goal** is to control for the variable effect of season on study reporting and heterogeneity using well-powered designs.  
 310 The expert-prediction for **implementation** is significantly high (grade,  $8.1 \pm 0.76$ ; 96% probability of higher score vs.  
 311 random; significant in 76.6% of simulations, t-test  $p=0.04 \pm 0.062$ ). We acknowledge that at times replication is  
 312 desirable, and also that ‘poor breeding colonies’ often yield insufficient mice to perform final experiments. In this  
 313 context, it is advisable to store fresh-frozen feces anaerobically ( $-80^{\circ}\text{C}$  with/without cryoprotectants; 7%-DMSO, 10%-  
 314 glycerol) from initial experimental mice for the colonization of newly available mice, and to store sufficient vacuum-  
 315 packed diet ( $-20^{\circ}\text{C}$ ) and supplies to last across experiments.

316  
 317 **Recommendation theme 5 on ‘Animal density, clusters, and study power’.**

318 First, our scoping review identified numerous laboratories publishing clustered MxCg data with few  
 319 cages/groups, without the verification of study power/sample sizes, or use of statistics for clustered-data. Then, our  
 320 survey and cost simulator showed financial-scientific discordance among scientists when deciding animal densities.  
 321 Unless higher densities are scientifically (not only financially) justifiable, housing 1 MxCg could yield more cost-  
 322 effective and powerful study designs by increasing the number of cages and minimizing the need to use advanced

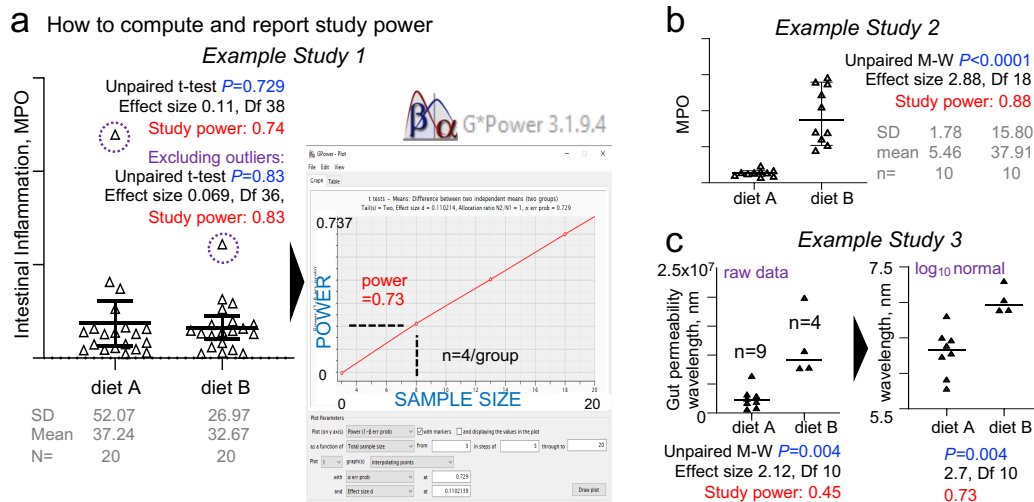

**Figure 8. Graphical examples of rapid ‘study power’ calculations and reporting of individually-caged mouse data.** a) Example of study power calculation & graphical reporting (post-hoc means after study completion, all datasets are real unpublished data). Intestinal inflammation in mice from two groups housed individually after pre-experimental cage microbiome normalization using IsPreFeH (fresh feces only; no bedding material). Post-test plot analysis (inset, software screenshot of power vs. sample size) shows that in this case, only 4 mice would be needed. Notice p-value and power increase after excluding outliers (dashed circles,  $N=19$ ). b) Power analysis for two groups with different variance (diet A, narrow SD; diet B, wide SD). Fecal MPO test following a diet intervention illustrates that for this diet, a sample size of 10 is sufficient to achieve a well-powered study despite large variance in diet B. c) Example of importance of data normalization (e.g., from raw small changes in millions,  $10^7$ , to a log scale) in post hoc power analysis. Fluorescence intensity units in a test after intervention caused early mortality in diet B. Although the p-value does not change, normalized data (smooth edges of datasets) increases study power as it fulfills assumptions of t-tests normality. Since all mice were individually caged, the dataset quality and the early mortality are not due to, or are confounded by cage effects. Therefore, despite the small sample size ( $n=9$  vs. 4), this is a well-powered study. The most recent version of open-source software G\*Power can be downloaded from <http://www.psych.uni-duesseldorf.de/abteilungen/aap/gpower3/>. See **Supplementary Figure 4** with step-by-step process to compute powers herein shown. Examples for power and sample size for studies with individually caged mice intended for ANOVA or regression analysis are available at <https://stats.idre.ucla.edu/other/gpower/>.

323 statistics.<sup>47,71</sup> We **recommend** to *'House one mouse per cage (unless more mice per cage is scientifically justifiable)*  
324 *and increase the number of cages per group (instead of few cages co-housing many mice which results in cage*  
325 *clustered-correlated data, lower study power and requires more mice to compensate for study power loss) to*  
326 *maximize the experimental and statistical value of each animal as a test subject during experimentation.'* The expert-  
327 prediction for **implementation** is moderately significant (grade,  $7.7 \pm 0.56$ ; 91.4% probability of higher score vs.  
328 random; significant in 63.3% of simulations,  $p=0.086 \pm 0.13$ ). The **goal** is to maximize the scientific/test value of each  
329 mouse by promoting individual housing, emphasizing that social stress has been equally demonstrated, irrespective  
330 of sex, for single- and socially-housed mice,<sup>72,73</sup> and to promote the use of study power through cost-effective,  
331 reproducible experiments. As expected, this recommendation elicited the most heterogeneous responses, reflecting a  
332 partial reluctance to modify current animal density practices (**Figure 7B**). To promote implementation and facilitate  
333 the accuracy/reproducibility of reports, we provide three graphical examples of why/how-to compute and report  
334 power/sample sizes for any completed experiment using single-caged mice and intuitive open-access software  
335 ('G\*power'<sup>74</sup> in **Figure 8A-C**, R<sup>75</sup>, and our STATA code below).

336  
337 **Recommendation theme 6 on 'Implementing statistical models to consider ICC in clustered data'.**

338 Depending on the experiment, we recognize that it is not always possible to single-house mice. Our review  
339 showed that scientists often analyze clustered observations using methods that mathematically function under the  
340 assumption of data independence (student T-, Mann-Whitney, One-/Two-way ANOVAs), without implementing  
341 statistics for intra-class ('intra-cage') correlated (ICC) cage-clustered data (Multivariable linear/logistic, Marginal,  
342 Generalized Estimating Equations, or Mixed Random/Fixed Regressions).<sup>47,76,77</sup> The ICC describes how units in a  
343 cluster resemble one another, and can be interpreted as the fraction of the total variance due to variation between  
344 clusters.<sup>47</sup> Housing multiple MxCg as homogeneous densities across study groups is logistically challenging using  
345 few cages. To expand the outreach of our multi-theme framework, and to support scientists with their analysis and  
346 publication of justifiable/clustered experiments, we **recommend** to *'Use statistical methods designed for analyzing*  
347 *clustered data when multiple mice are housed in one cage, and when data points are obtained from mice over time,*  
348 *to i) properly assess treatment effects, ii) determine the intraclass correlation coefficient for each study, and then iii)*  
349 *to use that information to rapidly generate experiment-specific, customizable study power tables to aid in the*  
350 *assessment, re-/design (if more mice or cages are needed), and reporting of adequately powered studies.'* The **goal**  
351 is to promote and facilitate the implementation of cage-clustered data analysis in mouse research by **i)** providing  
352 examples demonstrating the misleading effect when univariate methods are used for clustered-mice, and by **ii)**  
353 making our statistical code available to the public to gain familiarity with protocol principles of cluster-data statistical  
354 tools. Recommendation six is intended to serve as a technical guide supporting the framework, and therefore was not  
355 tested for implementability.

356 The statistical example we provide is based on data extracted (using ImageJ<sup>78</sup> analysis) from a published  
357 dot plot figure in a reviewed study that exclusively reported cohousing 5 MxCg, and where authors compared two  
358 diets using 8 and 9 MxGr (2 TCgxGr; **Figure 9A**). The published p-value was 0.058, but to emphasize our message,  
359 we slightly/evenly adjusted the extrapolated data to achieve a univariate  $p < 0.050$ . By simulating 5 possible cage-  
360 clustering scenarios, Figure 8 was designed to help visually understand the benefits of computing ICC and  
361 experiment-specific customizable power tables to determine whether more cages/group or mice/cage are needed to  
362 achieve study powers of ideally  $> 0.8$ .

363 When using clustered-data methods, we showed that only one of the five scenarios yielded a significant diet  
364 treatment effect (*i.e.*, scenario 2, where all cages were unbiased, having mice with high and low response values,  
365 something unlikely to occur naturally in clustered settings, **Figure 9B**). Data proves that artificial heterogeneity due to  
366 mouse caging and unsupervised 'cage-effects' lead to poor reproducibility (80% of cases would misleadingly show  
367 that the test diet induces an effect on the mouse response). Graphically, we show that the variability of ICC  
368 (computed after running the mixed-effect models) depends on the hypothetical mouse allocation to cages, which in  
369 turn influences the post-hoc estimations of study power (**Figure 9C-D**).

370 As a final practical product in this manuscript, we provide the statistical scheme/code in the GitHub  
371 repository ([https://github.com/axr503/cagecluster\\_powercode](https://github.com/axr503/cagecluster_powercode)) to implement this streamlined analysis and compute  
372 comprehensive power tables based on the ICC derived for each simulation to help scientists determine the best mice-  
373 to-cage combinations to match resources (**Figure 9E**). A 'quick reference' of actionable steps for all six themes is in  
374 **Supplementary Table 8**. To expand our implementability strategy for continuous assessment by the international  
375 scientific community the survey is available online (<https://forms.gle/LxPCydybSddcndZ7A>).

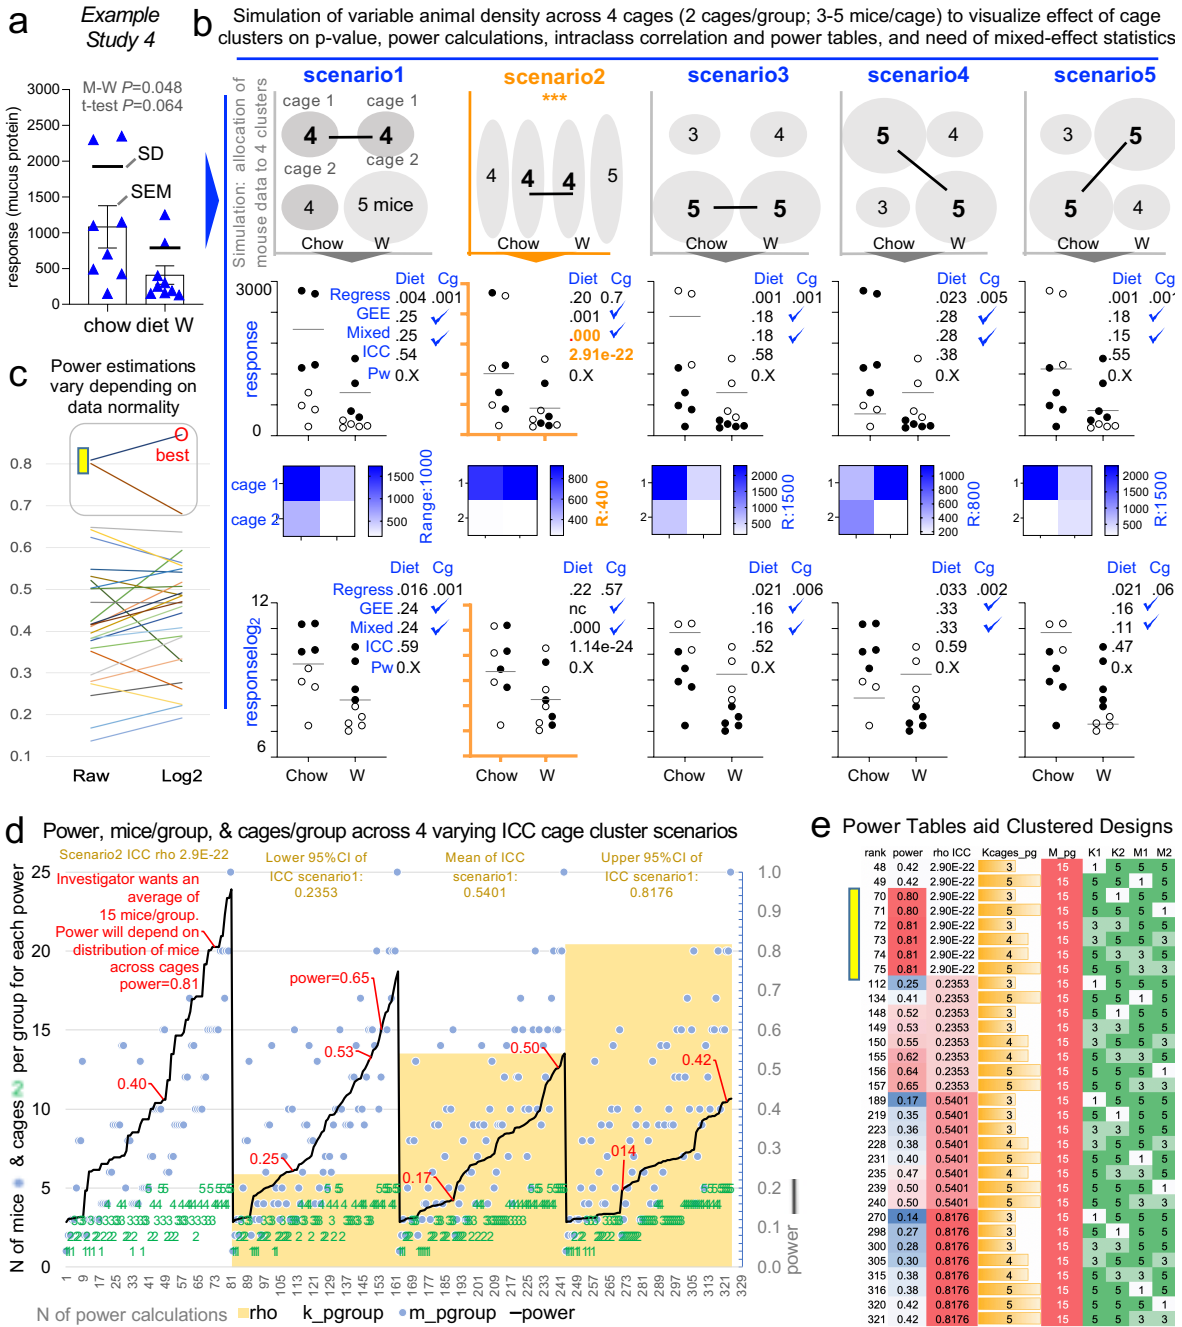

**Figure 9. Analysis of cage-clustered data, intra-class correlation coefficients and power tables to facilitate study design by the number of cages/group and mice/cage.** Five scenarios using a single dataset where mice housed as 5 mice/cage illustrate the effect of cage clustered data. Raw data extrapolated from one of the 172 reviewed studies. **a)** Extrapolated raw data (original published dot plot;  $p$ -value=0.059). Note that data from the diet 'W' group was not normally distributed (A-D  $p$ =0.005). **b)** Graphical representation of 5 scenarios considering different cage allocations of 2 cages/group.  $P < 0.05$  for the regression analysis ('Regress') indicates cage effect. Except for scenario 2 (with mice representing the entire data range spectrum for treatment outcome 'response'; y-axis), note that all scenarios are subject to significant cage effect. 'Diet', treatment; 'Cg', Cage effect. **c)** Paired line plot depicting power estimates for the same data, without transformation (left) and after log2 transformation (right). Note the best power estimation for raw data may have a marked influence on the power estimation based on log2. We advise log2 transformed data for this dataset. **d)** Line plot depicting power calculations for three ICCs, as a function of ICC, (histogram). Power estimations depend on ICC, simulation determined the  $n \times M \times Cg$  and  $TCg \times Gr$  needed to achieve a study power, which changes depending on degree of cage clustering (i.e., ICC, intra-class correlation coefficients). **e)** Power table illustrates the number and distribution of mice using a clustered design to achieve study power.

377 **DISCUSSION**

378  
379 This study and proposed framework were motivated by the identification of a wide heterogeneity in  
380 published methods relevant to diet, microbiome, and the pathogenesis of inflammatory bowel diseases and digestive  
381 health in humans, where mice models are critical to study diseases biology, translational interventions, or to inform  
382 clinical trials for humans. The actionable framework described however applies to any field of modern mouse  
383 research. Although it is impossible to develop a single consensus statement on practices pertaining to experimental  
384 supplies (e.g., bedding type, water, facilities) to accommodate every scientific community/goal, our proposed  
385 implementability statistics indicate that the 6-theme actionable framework described could be widely adopted to  
386 reduce the deleterious impact of these emerging concepts on artificial heterogeneity. This framework especially  
387 designed around reducing animal density, cage dirtiness, and cage microbiome bias, stresses the need of statistical  
388 methods for power and cluster data.

389 Herein, we confirmed that research methodology continues to vary in published literature, and as  
390 documented by a survey of academicians, such variability may be attributed to well-ingrained heterogeneous  
391 perceptions among scientists concerning how animal husbandry impacts the mouse microbiome. Animal density and  
392 the cost dilemma of how many cages are used to test hypotheses in experiments were deemed amenable for  
393 improvement. Because adjustments to facility settings are not easy to standardize, we propose that the most  
394 experimentally effective strategy to improve study power/reproducibility in the literature is to implement a lower  
395 number of mice per cage. From our analyses, we provide recommendation themes to minimize cage-clustering  
396 effects and implement clustered data analysis methods as a means to reduce artificial heterogeneity.

397 Although adding more cages to a study increases handling costs, studying '*less mice per cage is more*' is a  
398 pro-statistically powerful, comparably effective practice. The use of cost as a rationale for conducting cage-clustered  
399 experiments needs conscientious consideration, since housing costs are just a fraction of the research funds required  
400 for tests. Perhaps, institutions could provide discounts to investigators for the cost of housing when conducting  
401 experiments, because fewer MxCg requires less cage changes and experiments are often short-term. Logistically,  
402 since fewer MxCg may be an option limited by space in certain facilities, well-powered and well-analyzed cage-cluster  
403 studies is desirable.

404 **In conclusion**, we confirmed that research methodology continues to vary in published literature and as  
405 documented by a survey of academicians. Analyses indicate that the reporting of post-hoc study power calculations,  
406 in the context of the proposed framework, could be objectively used to guide and monitor the research power and  
407 reproducibility across mouse microbiome research at large.

---

410  
411 **MATERIALS and METHODS**

412 **Study overview.** As an overall methodological strategy to confirm and quantify the extent to which animal  
413 husbandry variability has been, and continues to be, present in mouse and microbiome research, we *first* conducted  
414 a quantitative verification of animal husbandry variability in academia *i)* by screening the recent published peer-  
415 reviewed literature (2018-2019) to infer the historic prevalence of prevailing practices that could have influenced  
416 research and *ii)* by conducting a survey of academicians across relevant professional organizations to determine the  
417 present status on beliefs and knowledge on husbandry practices. *Then*, we ranked the practices based on relevance  
418 to influence microbiome research, as perceived by respondents, to prioritize/make six recommendations. *Lastly*, to  
419 document the validity of such recommendations, we conducted a targeted literature search to cite examples enabling  
420 the analysis of such suggestions in future consensus efforts. Using a Delphi-based consensus strategy, these  
421 suggestions were graded for quality to compute heterogeneity and probability statistics for implementability by  
422 investigators. See Figure 1 for illustrated study overview.

423 **Quantification of husbandry methods heterogeneity.** As a test topic, we chose to use 'dietary studies in  
424 mice' as PubMed search terms to screen (scoping review) original peer-review studies for animal husbandry  
425 practices as of May 3<sup>rd</sup>, 2019, published literature (see references of identified studies in **Supplementary Materials**)  
426 To interrogate and quantify perceptions and opinions among academicians on animal husbandry practices that  
427 influence microbiome data variability, a one-time online IRB-approved survey with 11 multiple-choice questions was  
428 administered, via recruitment email, to eligible participants through membership list servers of the following: *i)* faculty  
429 of 17 NIH National Institute Diabetes and Digestive and Kidney Diseases (NIDDK) Silvio O'Conte Digestive Diseases  
430 Research Core Centers ('DDRCC'), which provide research support to local and national institutions, *ii)* registrants of

431 the 2018 Cleveland International Digestive Education and Science (IDEAS) Symposium hosted by the Cleveland  
432 DDRCC, Case Western Reserve University (CWRU), *iii*) registrants of the Taconic Biosciences Webinar titled  
433 'Cyclical Bias and Variability in Microbiome Research', *iv*) members of the American Association of Laboratory  
434 Animal Science ('AALAS'), and *v*) members of 'GNOTOBIOTIC' ListServ, forum of the National Gnotobiotics  
435 Association.

436 **Six evidence-based recommendations graded for future implementability.** To provide evidence-based  
437 suggestions and to support the development of a large-scale consensus report that can be implemented and  
438 beneficial to research, we used a ranking of the survey-derived husbandry practices to prioritize the husbandry topics  
439 deemed influential in mouse microbiome by respondents. Using Google PubMed and keywords contained in the  
440 survey question/topic (e.g., mouse, water), five coauthors cataloged relevant peer-reviewed scientific articles on each  
441 topic (targeted review). The information gathered, as tables, was used as assessment tools by 14 individuals to grade  
442 a table with 5-recommendations drafted by the lead and senior authors in this study. Collectively, the individuals  
443 comprised professional experiences across five research institutions; CWRU, The Scripps Research Institute, Kyorin  
444 University, South Dakota State University, The Ohio State University, University of Chicago, and Cornell University.  
445 To determine if the 5-recommendations could be implemented as a framework, individuals were asked to provide  
446 suggestions, new recommendations, and to grade (1, low; 10, highest) each item for sentence clarity, potential  
447 impact, and recommendability to others (**Supplementary Materials**). These 'implementability grades' numerically  
448 illustrate the potential for variance and adoption of the recommendations by others in mouse research.

449 **Ethical considerations.** All research was approved by the Case Western Reserve University Institutional  
450 Review Board (STUDY20180138).

451 **Statistics.** For computation purposes, animal/cage density data extracted from the scoping review were  
452 used to create a secondary index. Specifically, the number of animals per group (group size, MxGr) and the number  
453 of mice housed per cage (animal density, MxCg) were used to compute a semi-descriptive index metric of 'cage  
454 cluster effect' on each study: 'estimated number of cages per experimental group' (i.e., total n of cage clusters per  
455 group, TCgxGr = MxGr divided by MxCg). If a range was provided for animal density (e.g., 1-5), estimations were  
456 computed using the median value within the range, as well as the minimum and maximum values. Average of  
457 estimated center values were used for analysis and graphical summaries. For Figure 9, study selection was based on  
458 the use of 5 mice/cage, and that study results were published as dot plots (allowing us to infer the raw data for our  
459 analysis) in the manuscript. Descriptive statistics for parametric data were employed if assumptions were fulfilled  
460 (e.g., 1-way ANOVA). Non-fulfilled assumptions were addressed with nonparametric methods (e.g., Kruskal-Wallis).  
461 As needed, 95% confidence intervals are reported to account for sample size (e.g., MxCg; surveyed participants) and  
462 for external validity context. Significance was held at  $p < 0.05$ . Analysis, study powers, and graphics were conducted  
463 with R, STATA, Python 3.0 Anaconda, GraphPad and G\*Power.<sup>74</sup> G\*Power is an open-source power specialized  
464 software for various family of tests; calculations only require p-value (alpha), sample size, and  $\text{mean} \pm \text{SD}$  to compute  
465 effect size. Excel was used to create a cage handling frequency and cost spreadsheet calculator.

466  
467

#### ACKNOWLEDGMENTS.

Authors want to express their gratitude to Mrs. Colleen Karlo at Case Western Reserve University for her guidance during survey preparation and institutional guidance to ensure compliance and protection of the human subjects that participated in the survey. The authors are indebted to all the survey participants for their time and suggestions. Jonathan Craven for his administrative support and the IDEAS symposium participants. Special thanks go to Drs. Jung-Fu Chang, DVM, PhD, Population Medicine, Cornell University; Joy Scaria, PhD, Animal Diseases Research and Diagnostic Laboratory, South Dakota State University; Craig L. Franklin, DVM, PhD, Mutant Mouse Resource and Research Center, Department of Veterinary Pathobiology, University of Missouri-Columbia; Eugene B. Chang, MD, PhD, Department of Medicine and Microbiome Center, University of Chicago, for enlightening discussions, comments and scientific suggestions in various phases of this study which ultimately influenced the directions and focus of the present report.

#### AUTHORS CONTRIBUTIONS

AB and ARP envisioned and planned this study, conducted the survey and data analysis, interpreted the data, and wrote initial manuscript draft. AL DK and GL conducted literature searches under the direction of AB and ARP, read the manuscript, and provided critical comments for evidence based-factors. All authors were involved in providing comments and discussing the six recommendations drafted by the lead and senior authors. All authors reviewed and commended on the final recommendations. ARP and SI implemented the grading strategy of recommendations. ARP conducted statistical analysis and power analysis, outlined excel calculator, and wrote statistical scripts. ELM provided suggestions and verified statistical scripts. FC and external MS, JM and BRT were major contributors in interpretation, rationale for outreach of study and contributed with suggestions during manuscript preparation. All authors approved the final manuscript.

**Grant Support:** This work and authors were partially supported by the National Institutes of Health Grants P01DK091222, R01DK055812, and P30DK097948 to FC; T32DK083251 and F32DK117585 to AB; P01DK091222-Germ-free and Gut Microbiome Core and R21DK118373 to ARP, and R01AI143821 to MS/ARP.

## REFERENCES

- Rodriguez-Palacios, A., *et al.* 'Cyclical Bias' in Microbiome Research Revealed by A Portable Germ-Free Housing System Using Nested Isolation. *Sci Rep* **8**, 18 (2018).
- Franklin, C.L. & Ericsson, A.C. Microbiota and reproducibility of rodent models. *Lab Animal* **46**, 114-122 (2017).
- Rodriguez-Palacios, A., *et al.* The Artificial Sweetener Splenda Promotes Gut Proteobacteria, Dysbiosis, and Myeloperoxidase Reactivity in Crohn's Disease-Like Ileitis. *Inflamm Bowel Dis* **24**, 1005-1020 (2018).
- McCoy, K.D., Geuking, M.B. & Ronchi, F. Gut Microbiome Standardization in Control and Experimental Mice. *Curr Protoc Immunol* **117**, 23 21-23 21 13 (2017).
- Laukens, D., Brinkman, B.M., Raes, J., De Vos, M. & Vandenabeele, P. Heterogeneity of the gut microbiome in mice: guidelines for optimizing experimental design. *Fems Microbiol Rev* **40**, 117-132 (2016).
- Collins, F.S. & Tabak, L.A. Policy: NIH plans to enhance reproducibility. *Nature* **505**, 612-613 (2014).
- Perrin, S. Preclinical research: Make mouse studies work. *Nature* **507**, 423-425 (2014).
- Health, N.N.I.o. Enhancing reproducibility through rigor and transparency. Vol. 2018.
- Younger, D.S. & Chen, X. Research Methods in Epidemiology. *Neuro Clin* **34**, 815-835 (2016).
- Slack, M.K. & Draugalis, J.R. Establishing the internal and external validity of experimental studies. *Am J Health Syst Pharm* **58**, 2173-2181; quiz 2182-2173 (2001).
- Patino, C.M. & Ferreira, J.C. Internal and external validity: can you apply research study results to your patients? *J Bras Pneumol* **44**, 183 (2018).
- Ioannidis, J.P.A. Why most published research findings are false. *Plos Med* **2**, 696-701 (2005).
- Hoenig, J.H., DM. The abuse of power: the pervasive fallacy of power calculations for data analysis. *The American Statistician* **55**, 1-6 (2001).
- Walker, M., *et al.* Mixed-strain housing for female C57BL/6, DBA/2, and BALB/c mice: validating a split-plot design that promotes refinement and reduction. *BMC Med Res Methodol* **16**, 11 (2016).
- Chen, K., *et al.* Preventive Effects and Mechanisms of Garlic on Dyslipidemia and Gut Microbiome Dysbiosis. *Nutrients* **11**(2019).
- Liu, Y., Wu, X. & Jiang, H. High dietary fat intake lowers serum equol concentration and promotes prostate carcinogenesis in a transgenic mouse prostate model. *Nutr Metab (Lond)* **16**, 24 (2019).
- Nerurkar, P.V., Orias, D., Soares, N., Kumar, M. & Nerurkar, V.R. Momordica charantia (bitter melon) modulates adipose tissue inflammasome gene expression and adipose-gut inflammatory cross talk in high-fat diet (HFD)-fed mice. *J Nutr Biochem* **68**, 16-32 (2019).
- Bang, S.J., *et al.* Effect of raw potato starch on the gut microbiome and metabolome in mice. *Int J Biol Macromol* **133**, 37-43 (2019).
- Poole, A.C., *et al.* Human Salivary Amylase Gene Copy Number Impacts Oral and Gut Microbiomes. *Cell Host Microbe* **25**, 553-564 e557 (2019).
- Liu, T., *et al.* A More Robust Gut Microbiota in Calorie-Restricted Mice Is Associated with Attenuated Intestinal Injury Caused by the Chemotherapy Drug Cyclophosphamide. *Mbio* **10**(2019).
- Bernard, A., *et al.* A Preventive Prebiotic Supplementation Improves the Sweet Taste Perception in Diet-Induced Obese Mice. *Nutrients* **11**(2019).
- Vidal-Lletjos, S., *et al.* Dietary Protein Intake Level Modulates Mucosal Healing and Mucosa-Adherent Microbiota in Mouse Model of Colitis. *Nutrients* **11**(2019).
- Wu, Y., *et al.* Inhibition of Tumor Growth by Dietary Indole-3-Carbinol in a Prostate Cancer Xenograft Model May Be Associated with Disrupted Gut Microbial Interactions. *Nutrients* **11**(2019).
- Manuel, C.R., Latuga, M.S., Ashby, C.R., Jr. & Reznik, S.E. Immune tolerance attenuates gut dysbiosis, dysregulated uterine gene expression and high-fat diet potentiated preterm birth in mice. *Am J Obstet Gynecol* **220**, 596 e591-596 e528 (2019).
- Xu, J., *et al.* Jamun (Eugenia jambolana Lam.) Fruit Extract Prevents Obesity by Modulating the Gut Microbiome in High-Fat-Diet-Fed Mice. *Mol Nutr Food Res* **63**, e1801307 (2019).
- Tousen, Y., *et al.* Resistant Starch Attenuates Bone Loss in Ovariectomised Mice by Regulating the Intestinal Microbiota and Bone-Marrow Inflammation. *Nutrients* **11**(2019).
- Zinno, P., *et al.* Supplementation with dairy matrices impacts on homocysteine levels and gut microbiota composition of hyperhomocysteinemic mice. *Eur J Nutr* (2019).
- Ribeiro, F.M., *et al.* Limited Effects of Low-to-Moderate Aerobic Exercise on the Gut Microbiota of Mice Subjected to a High-Fat Diet. *Nutrients* **11**(2019).
- Tanabe, K., *et al.* Dietary Fructooligosaccharide and Glucmannan Alter Gut Microbiota and Improve Bone Metabolism in Senescence-Accelerated Mouse. *J Agric Food Chem* **67**, 867-874 (2019).
- Raza, G.S., *et al.* Hypocholesterolemic Effect of the Lignin-Rich Insoluble Residue of Brewer's Spent Grain in Mice Fed a High-Fat Diet. *J Agric Food Chem* **67**, 1104-1114 (2019).
- Wu, S., *et al.* Modulation of Gut Microbiota by Lonicera caerulea L. Berry Polyphenols in a Mouse Model of Fatty Liver Induced by High Fat Diet. *Molecules* **23**(2018).
- Du, Y.W., *et al.* Effects of Taste Signaling Protein Abolishment on Gut Inflammation in an Inflammatory Bowel Disease Mouse Model. *J Vis Exp* (2018).
- Albaugh, V.L., *et al.* Role of Bile Acids and GLP-1 in Mediating the Metabolic Improvements of Bariatric Surgery. *Gastroenterology* **156**, 1041-1051 e1044 (2019).
- Chen, Y.T., *et al.* A combination of Lactobacillus mali APS1 and dieting improved the efficacy of obesity treatment via manipulating gut microbiome in mice. *Sci Rep* **8**, 6153 (2018).
- Pace, F., *et al.* Helminth infection in mice improves insulin sensitivity via modulation of gut microbiota and fatty acid metabolism. *Pharmacol Res* **132**, 33-46 (2018).
- Martinez-Guryn, K., *et al.* Small Intestine Microbiota Regulate Host Digestive and Absorptive Adaptive Responses to Dietary Lipids. *Cell Host Microbe* **23**, 458-469 e455 (2018).
- Zheng, X., *et al.* Food withdrawal alters the gut microbiota and metabolome in mice. *Faseb J* **32**, 4878-4888 (2018).
- Pan, F., *et al.* Predominant gut Lactobacillus murinus strain mediates anti-inflammatory effects in calorie-restricted mice. *Microbiome* **6**, 54 (2018).
- Wang, D., *et al.* In utero and lactational exposure to BDE-47 promotes obesity development in mouse offspring fed a high-fat diet: impaired lipid metabolism and intestinal dysbiosis. *Arch Toxicol* **92**, 1847-1860 (2018).
- An, J., *et al.* Physiological mechanisms of sustained fumagillin-induced weight loss. *JCI Insight* **3**(2018).
- Janssen, A.W.F., *et al.* Loss of angiotensin-like 4 (ANGPTL4) in mice with diet-induced obesity uncouples visceral obesity from glucose intolerance partly via the gut microbiota. *Diabetologia* **61**, 1447-1458 (2018).



42. Battson, M.L., *et al.* Suppression of gut dysbiosis reverses Western diet-induced vascular dysfunction. *Am J Physiol Endocrinol Metab* **314**, E468-E477 (2018).
43. Connor, K.L., *et al.* Maternal metabolic, immune, and microbial systems in late pregnancy vary with malnutrition in mice. *Biol Reprod* **98**, 579-592 (2018).
44. Li, C.C., *et al.* Tomato Powder Inhibits Hepatic Steatosis and Inflammation Potentially Through Restoring SIRT1 Activity and Adiponectin Function Independent of Carotenoid Cleavage Enzymes in Mice. *Mol Nutr Food Res* **62**, e1700738 (2018).
45. Zeng, H., Ishaq, S.L., Liu, Z. & Bukowski, M.R. Colonic aberrant crypt formation accompanies an increase of opportunistic pathogenic bacteria in C57BL/6 mice fed a high-fat diet. *J Nutr Biochem* **54**, 18-27 (2018).
46. Pearl, D.L. Making the most of clustered data in laboratory animal research using multi-level models. *ILAR J* **55**, 486-492 (2014).
47. Moen, E.L., Fricano-Kugler, C.J., Luikart, B.W. & O'Malley, A.J. Analyzing Clustered Data: Why and How to Account for Multiple Observations Nested within a Study Participant? *PLoS One* **11**, e0146721 (2016).
48. Ericsson, A.C., *et al.* The influence of caging, bedding, and diet on the composition of the microbiota in different regions of the mouse gut. *Sci Rep* **8**(2018).
49. Kilkenny, C., Browne, W.J., Cuthill, I.C., Emerson, M. & Altman, D.G. Improving bioscience research reporting: the ARRIVE guidelines for reporting animal research. *PLoS Biol* **8**, e1000412 (2010).
50. Rausch, P., *et al.* Analysis of factors contributing to variation in the C57BL/6J fecal microbiota across German animal facilities. *Int J Med Microbiol* **306**, 343-355 (2016).
51. Rodriguez-Palacios, A., *et al.* Clinical Effects of Gamma-Radiation-Resistant *Aspergillus sydowii* on Germ-Free Mice Immunologically Prone to Inflammatory Bowel Disease. *J Pathog* **2016**, 5748745 (2016).
52. McCafferty, J.M., M.; Gharaibeh, RZ.; Arthur, JC.; Perez-Chanona, E.; Sha, W.; Jobin, C.; Fodor, AA. Stochastic changes over time and not founder effects drive cage effects in microbial community assembly in a mouse model. *The ISME Journal volume 7*, 2116-2125 (2013).
53. Hart, M.L., *et al.* Development of outbred CD1 mouse colonies with distinct standardized gut microbiota profiles for use in complex microbiota targeted studies. *Sci Rep* **8**(2018).
54. Rodriguez-Palacios, A., Aladyshkina, N. & Cominelli, F. Stereomicroscopy and 3D-target myeloperoxidase intestinal phenotyping following a fecal flora homogenization protocol. *Protocol Exchange* (2015).
55. Miyoshi, J., *et al.* Minimizing confounders and increasing data quality in murine models for studies of the gut microbiome. *PeerJ* **6**, e5166 (2018).
56. Velazquez, E.M., *et al.* Endogenous Enterobacteriaceae underlie variation in susceptibility to Salmonella infection. *Nat Microbiol* **4**, 1057-1064 (2019).
57. Robertson, S.J., *et al.* Comparison of Co-housing and Littermate Methods for Microbiota Standardization in Mouse Models. *Cell Rep* **27**, 1910-1919 e1912 (2019).
58. Galbraith, S., Daniel, J.A. & Vissel, B. A study of clustered data and approaches to its analysis. *J Neurosci* **30**, 10601-10608 (2010).
59. Kleinman, K.M., J.; Reich, N.; Obeng, D. Power Calculations for Cluster-Randomized and Cluster-Randomized Crossover Trials. (CRAN, 2017).
60. Barham, K. ISMTE Recap: Text recycling and self-plagiarism in academic publishing Vol. 2019 (Technica Editorial Services).
61. Harriman, S. & Patel, J. Text recycling: acceptable or misconduct? *BMC Med* **12**, 148 (2014).
62. Burdine, L.K., de Castro Maymone, M.B. & Vashi, N.A. Text recycling: Self-plagiarism in scientific writing. *Int J Womens Dermatol* **5**, 134-136 (2019).
63. Montonye, D.R., *et al.* Acclimation and Institutionalization of the Mouse Microbiota Following Transportation. *Front Microbiol* **9**, 1085 (2018).
64. Ericsson, A.C., Personett, A.R., Turner, G., Dorfmeier, R.A. & Franklin, C.L. Variable Colonization after Reciprocal Fecal Microbiota Transfer between Mice with Low and High Richness Microbiota. *Front Microbiol* **8**, 196 (2017).
65. Rodriguez-Palacios, A., Khoretonenko, M.V. & Ilic, S. Institutional protocols for the oral administration (gavage) of chemicals and microscopic microbial communities to mice: Analytical consensus. *Exp Biol Med (Maywood)* **244**, 459-470 (2019).
66. Leone, V., *et al.* Effects of diurnal variation of gut microbes and high-fat feeding on host circadian clock function and metabolism. *Cell Host Microbe* **17**, 681-689 (2015).
67. Thaiss, C.A., *et al.* Microbiota Diurnal Rhythmicity Programs Host Transcriptome Oscillations. *Cell* **167**, 1495-1510 e1412 (2016).
68. Nobs, S.P., Tuganbaev, T. & Elinav, E. Microbiome diurnal rhythmicity and its impact on host physiology and disease risk. *EMBO Rep* **20**(2019).
69. Bangsgaard Bendtsen, K.M., *et al.* Gut microbiota composition is correlated to grid floor induced stress and behavior in the BALB/c mouse. *PLoS One* **7**, e46231 (2012).
70. Ericsson, A.C. & Franklin, C.L. Manipulating the Gut Microbiota: Methods and Challenges. *ILAR J* **56**, 205-217 (2015).
71. Dohoo, I.M., W.; Stryhn, H. . *Veterinary Epidemiologic Research*, (AVC, Inc, 2003).
72. Bartolomucci, A., *et al.* Social factors and individual vulnerability to chronic stress exposure. *Neurosci Biobehav Rev* **29**, 67-81 (2005).
73. Arndt, S.S., *et al.* Individual housing of mice--impact on behaviour and stress responses. *Physiol Behav* **97**, 385-393 (2009).
74. Faul, F., Erdfelder, E., Lang, A.G. & Buchner, A. G\*Power 3: a flexible statistical power analysis program for the social, behavioral, and biomedical sciences. *Behav Res Methods* **39**, 175-191 (2007).
75. Quick-R. in *Power Analysis*, Vol. 2019 (DataCamp).
76. Killip, S., Mahfoud, Z. & Pearce, K. What is an intracluster correlation coefficient? Crucial concepts for primary care researchers. *Ann Fam Med* **2**, 204-208 (2004).
77. Kelcey, B., Shen, Z. & Spybrook, J. Intraclass Correlation Coefficients for Designing Cluster-Randomized Trials in Sub-Saharan Africa Education. *Eval Rev* **40**, 500-525 (2016).
78. Schneider, C.A., Rasband, W.S. & Eliceiri, K.W. NIH Image to ImageJ: 25 years of image analysis. *Nat Methods* **9**, 671-675 (2012).
79. Barnett, J.A. & Gibson, D.L. H2Oh No! The importance of reporting your water source in your in vivo microbiome studies. *Gut Microbes* **10**, 261-269 (2019).
